# Supplementary material
Source: Springer Nature journal article supplement (https://www.springermedizin.de/resource/supplementary/13018_2009_121_MOESM4_ESM.pdf/9636360)
Supplement: MOESM4 [file 9636360]

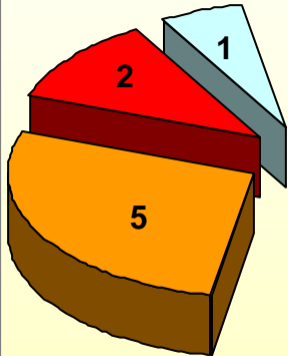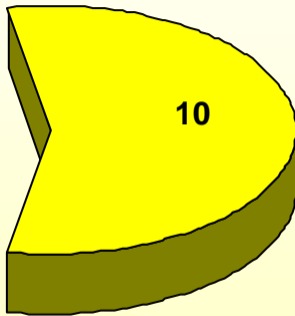

- Pure dysesthesia
- Motor deficit and dysesthesia
- Motor and sensory deficit with dysesthesia
- Motor deficit only
